# Supplementary material for: Are the three hydroxyphenyl radical isomers created equal? – The role of the phenoxy radical –
Source: Royal Society of Chemistry journal article supplement (doi:10.1039/c5cp05346c), 2015-01-01
Supplement: c5cp05346c1.pdf [file c5cp05346c1.pdf]

**Supporting Information to:**

# Are the Three Hydroxyphenyl Radical Isomers Created Equal?

– The Role of the Phenoxy Radical –

*Patrick Hemberger,<sup>a)</sup> \* Gabriel da Silva,<sup>b)</sup> Adam J. Trevitt,<sup>c)</sup> Thomas Gerber,<sup>a)</sup>*

*Andras Bodi<sup>a)</sup>*

a) Molecular Dynamics Group, Paul Scherrer Institute, 5232 Villigen PSI,  
Switzerland

b) Department of Chemical and Biomolecular Engineering, The University of  
Melbourne, Victoria 3010, Australia

c) School of Chemistry, University of Wollongong, New South Wales 2522, Australia

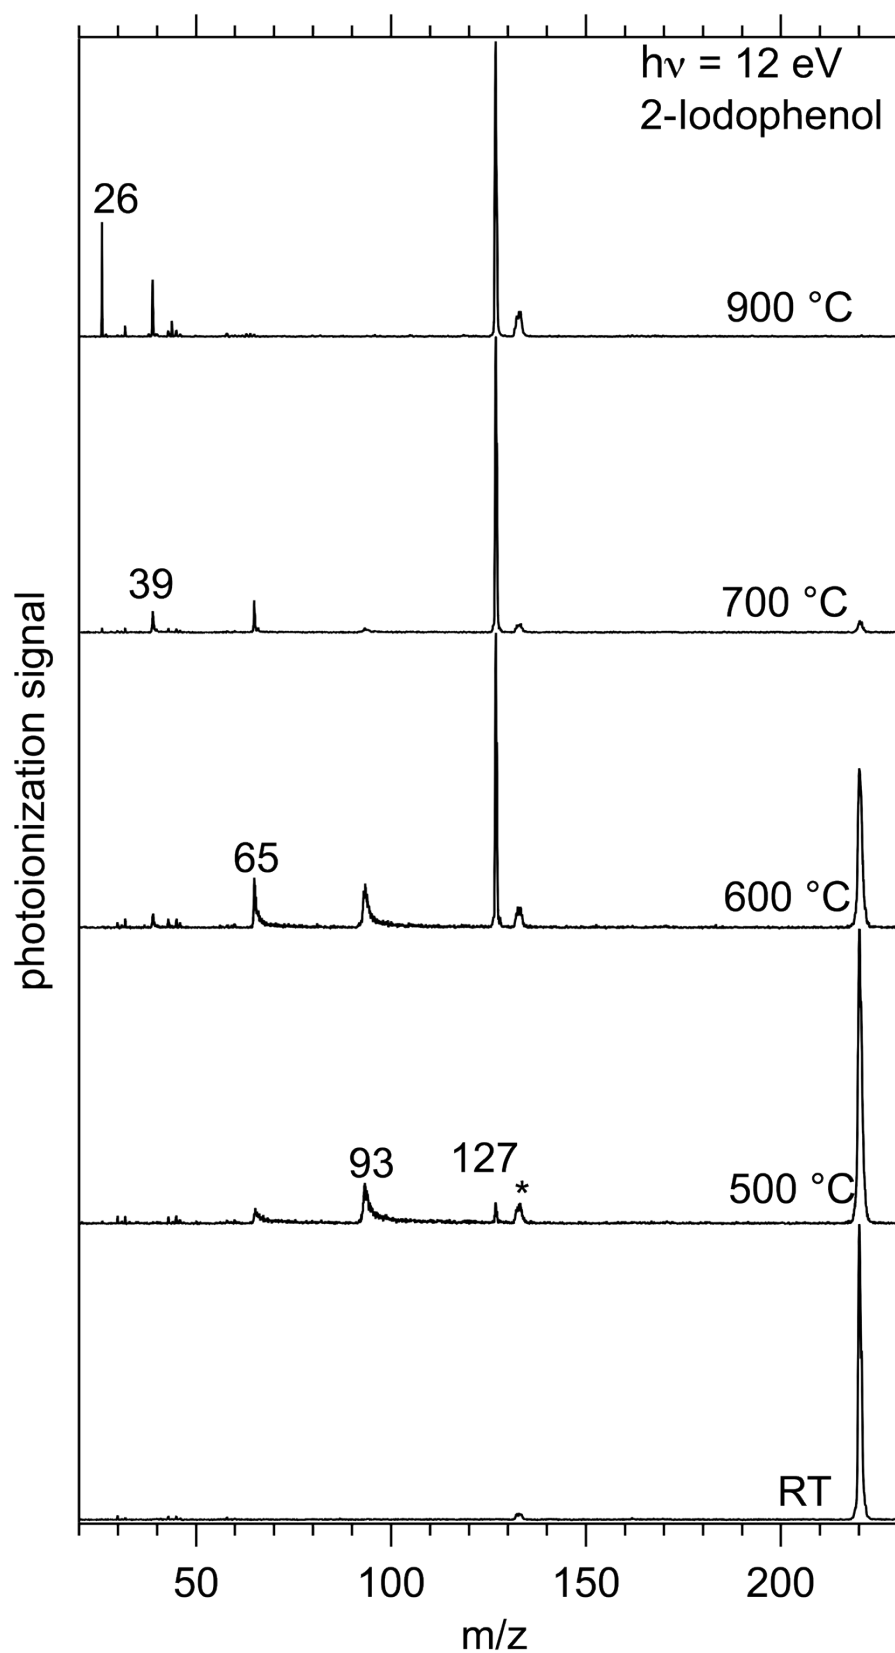

**Figure S1.** Mass spectra of 2-iodophenol as a function of the reactor temperature taken at 12 eV. Besides propargyl ( $m/z = 39$ ) we also observe the generation of acetylene ( $m/z = 26$ ), as direct decomposition product of cyclopentadienyl ( $m/z = 65$ ).  $m/z = 127$  can be assigned to iodine atoms.

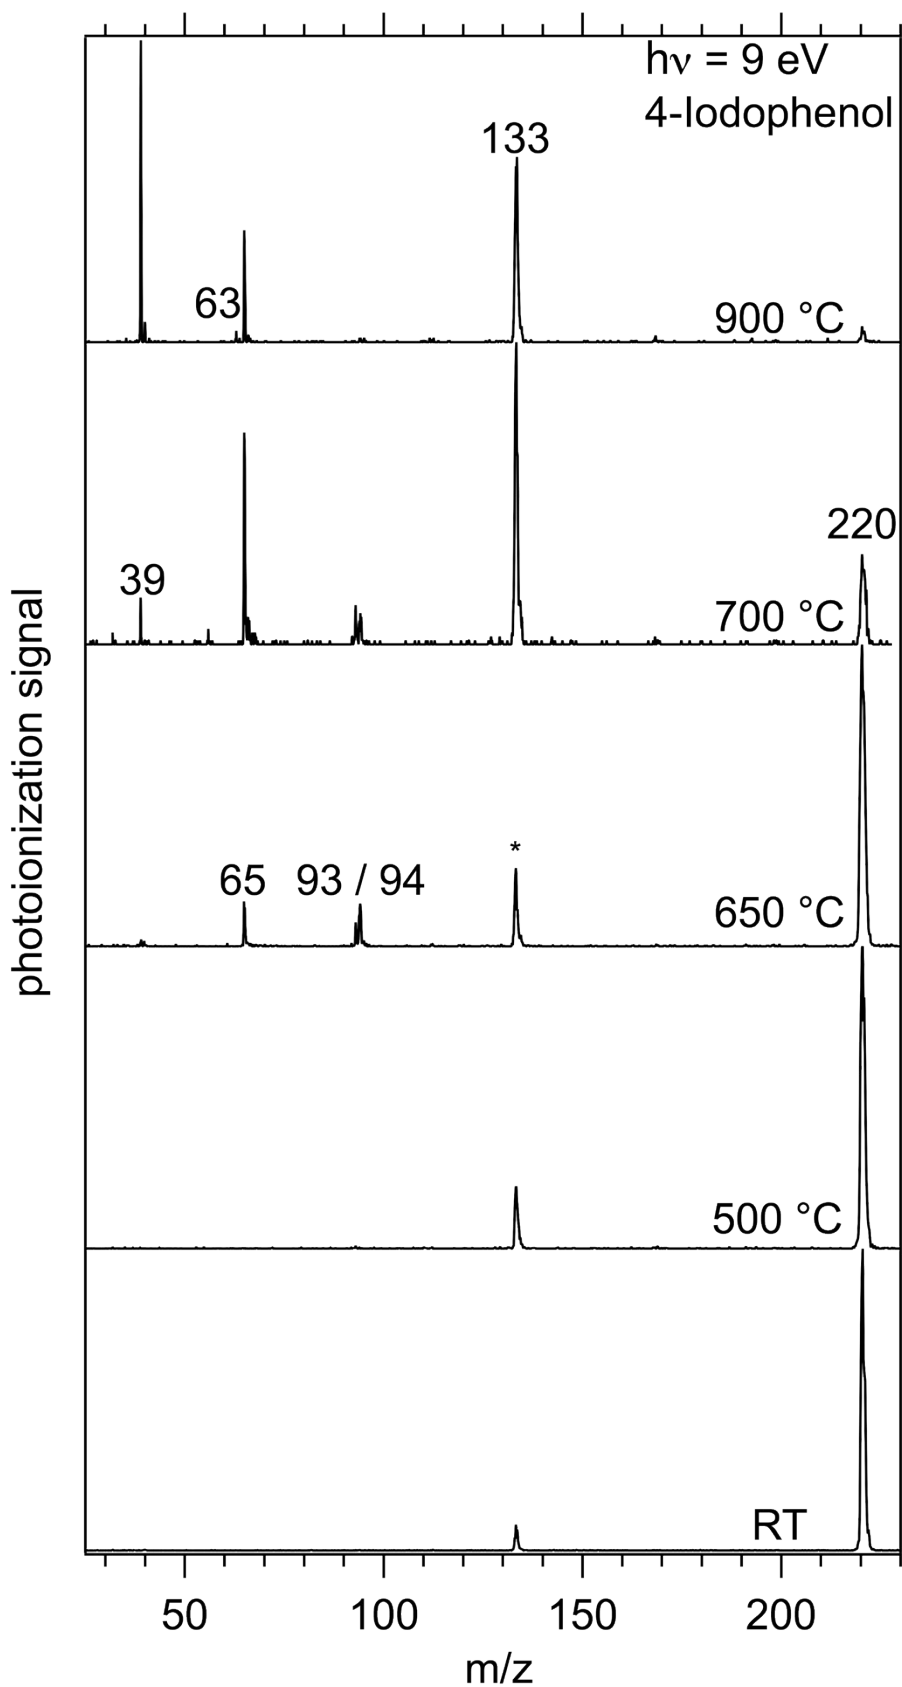

**Figure S2.** Mass spectra of 4-iodophenol as a function of the reactor temperature. The peak at  $m/z = 133$  can be assigned to 1,2,3,4- tetrahydroquinoline, which remained in the ionization chamber from previous experiments and does not affect the discussion herein. The spectra are normalized to the most intense peak.

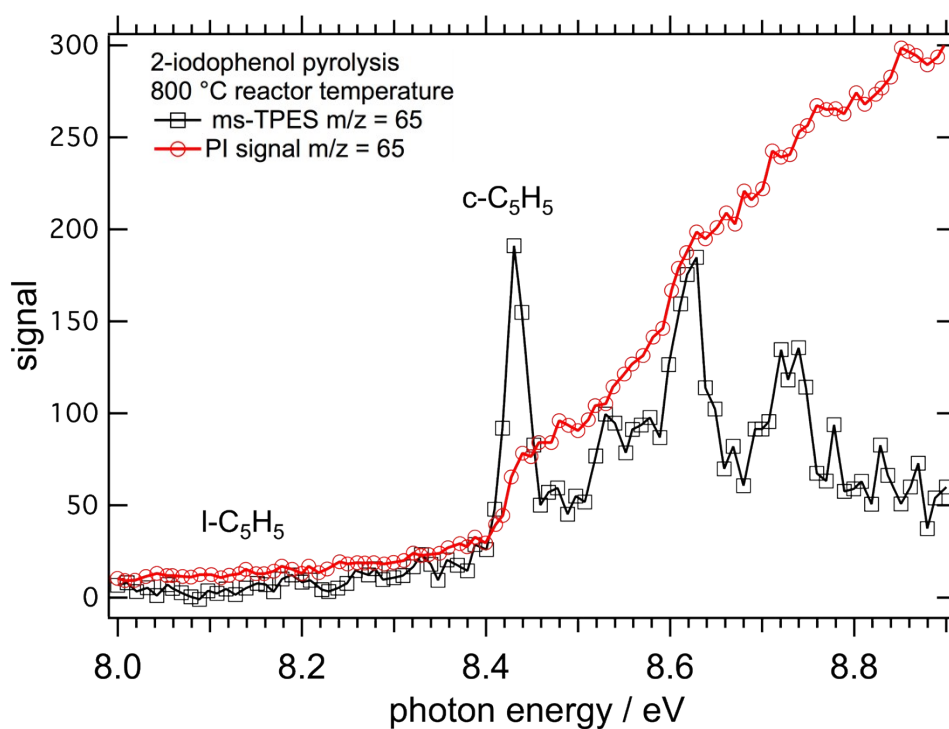

**Figure S3.** ms-TPE and PI spectrum of  $m/z = 65$  as generated from decomposing 2-iodophenol. Besides  $c\text{-C}_5\text{H}_5$ , trace amounts of  $l\text{-C}_5\text{H}_5$  are also present, since the PI signal below 8.3 eV is not zero.

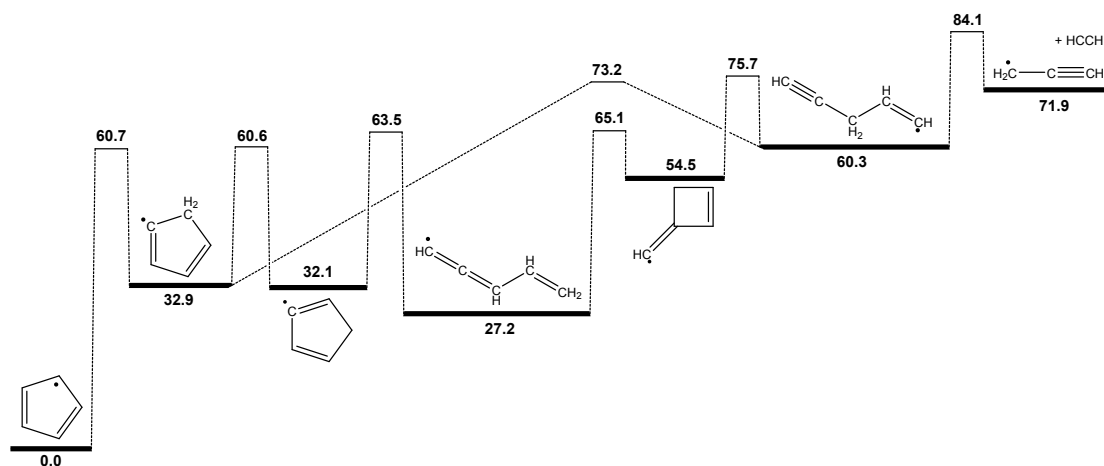

**Figure S4.** Potential energy surface showing an alternative decomposition route for  $c\text{-C}_5\text{H}_5$  proceeding via  $l\text{-C}_5\text{H}_5$  (1-vinylpropargyl) which can explain the signal below 8.2 eV in the PI or ms-TPE spectrum. G3X-K 0 K energies are shown in kcal/mol.

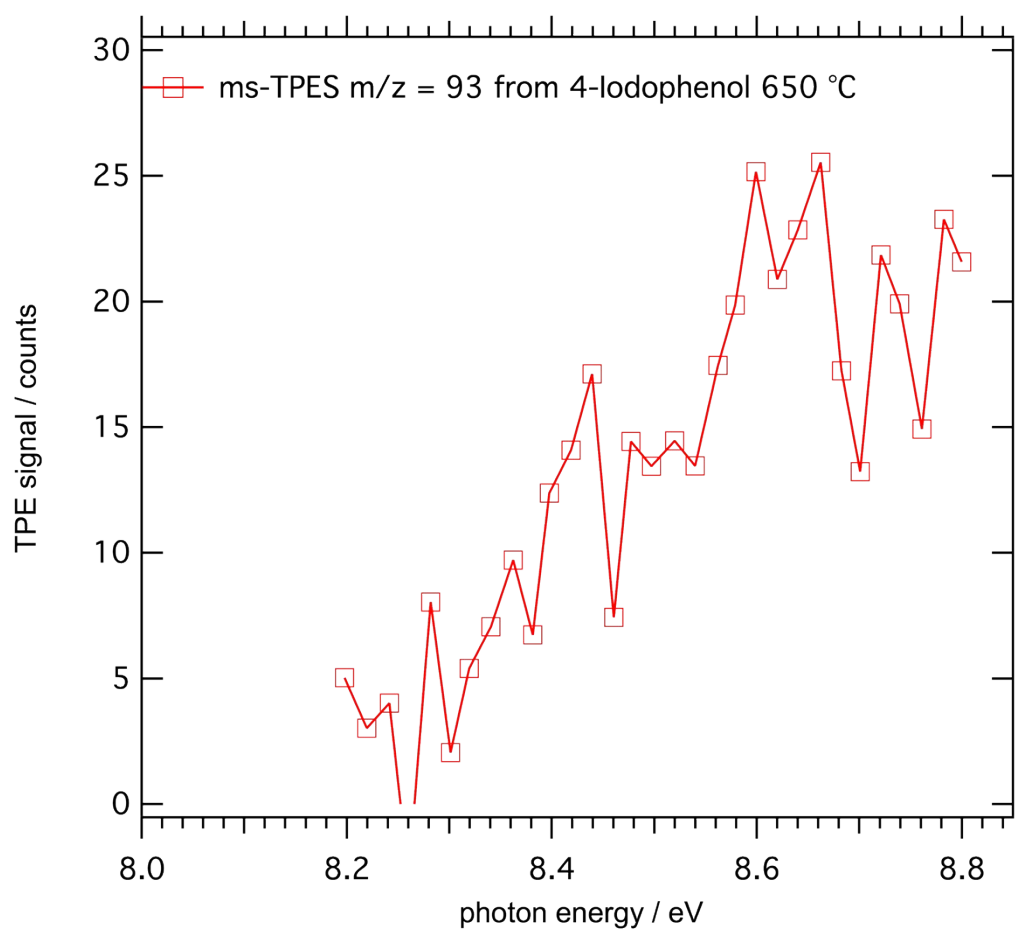

**Figure S5.** ms-TPE spectrum of  $m/z = 93$  derived from 4-iodophenol at 650 °C reactor temperature.
